# Supplementary material
Source: publisher site journal article supplement (https://www.dovepress.com/article/295610)

**Supplemental Table 1. Comparison of patients with and without previous optic neuritis at baseline.**

|                                          | Patients without previous unilateral optic neuritis (average of both eye used for statistical analyses, n=39) | Patients with previous unilateral optic neuritis (only one eye used for statistical analyses, n=21) | p-value            |
|------------------------------------------|---------------------------------------------------------------------------------------------------------------|-----------------------------------------------------------------------------------------------------|--------------------|
| Females <sup>1</sup>                     | 25 (64.1)                                                                                                     | 14 (71.4)                                                                                           | 0.565 <sup>4</sup> |
| Age at onset <sup>2</sup> (years)        | 34.0 (12.1)                                                                                                   | 35.2 (13.4)                                                                                         | 0.726 <sup>5</sup> |
| Disease course                           |                                                                                                               |                                                                                                     |                    |
| RMS <sup>1</sup>                         | 33 (84.6)                                                                                                     | 20 (95.2)                                                                                           | 0.222 <sup>4</sup> |
| SPMS <sup>1</sup>                        | 6 (15.4)                                                                                                      | 1 (4.8)                                                                                             |                    |
| MS disease duration <sup>2</sup> (years) | 5.9 (8.0)                                                                                                     | 7.0 (9.1)                                                                                           | 0.630 <sup>5</sup> |
| ARR at baseline <sup>2</sup>             | 0.64 (0.79)                                                                                                   | 0.71 (0.81)                                                                                         | 0.747 <sup>5</sup> |
| EDSS at baseline <sup>3</sup>            | 1.0 (0 - 6.0)                                                                                                 | 1.0 (0 - 6.5)                                                                                       | 0.765 <sup>6</sup> |
| DMT at baseline                          |                                                                                                               |                                                                                                     |                    |
| Any DMT <sup>1</sup>                     | 25 (64.1)                                                                                                     | 12 (60.0)                                                                                           | 0.758 <sup>4</sup> |
| Number of previous DMTs <sup>3</sup>     | 0 (0 - 3)                                                                                                     | 0 (0 - 3)                                                                                           | 0.813 <sup>6</sup> |
| Interferon beta <sup>1</sup>             | 1 (2.6)                                                                                                       | 1 (4.8)                                                                                             | 0.262 <sup>4</sup> |
| Glatiramer acetate <sup>1</sup>          | 5 (12.8)                                                                                                      | 4 (19.1)                                                                                            |                    |
| Dimethyl fumarate                        | 5 (12.8)                                                                                                      | 2 (9.5)                                                                                             |                    |
| Fingolimod <sup>1</sup>                  | 8 (20.5)                                                                                                      | 4 (19.1)                                                                                            |                    |
| Alemtuzumab <sup>1</sup>                 | 1 (2.6)                                                                                                       | 0 (0)                                                                                               |                    |
| antiCD20-Mabs <sup>1</sup>               | 5 (12.8)                                                                                                      | 1 (4.8)                                                                                             |                    |

**Notes:** <sup>1</sup>absolute number (percentage). <sup>2</sup>mean and standard deviation. <sup>3</sup>median and range. <sup>4</sup>chi-square test <sup>5</sup>t-test. <sup>6</sup>Mann-Whitney-U test.

**Abbreviations:** antiCD20-Mabs, anti-cluster-of-differentiation-20-monoclonal antibodies (ocrelizumab, rituximab, ofatumumab); ARR, annualized relapse rate; CEL, contrast-enhancing lesions; DMT, disease modifying treatment; EDSS, Expanded Disability Status Scale; MS, multiple sclerosis; RMS, relapsing MS; SPMS, secondary progressive MS.

**Supplemental Figure 1. Risk of disability worsening according to GCIPL below or above 70µm at baseline.**

**Notes:** HR and 95% confidence intervals calculated by multivariate Cox regression models adjusting for sex, age, disease course, disease duration, EDSS at baseline and DMT status.

Number of patients at risk: baseline: 60; year 1: 52; year 2: 33; year 3: 19; year 4: 13; year 5: 7.

**Abbreviations:** DMT, disease-modifying treatment; EDSS, expanded disability status scale; GCIPL, ganglion cell and inner plexiform layer; HR, hazard ratio.

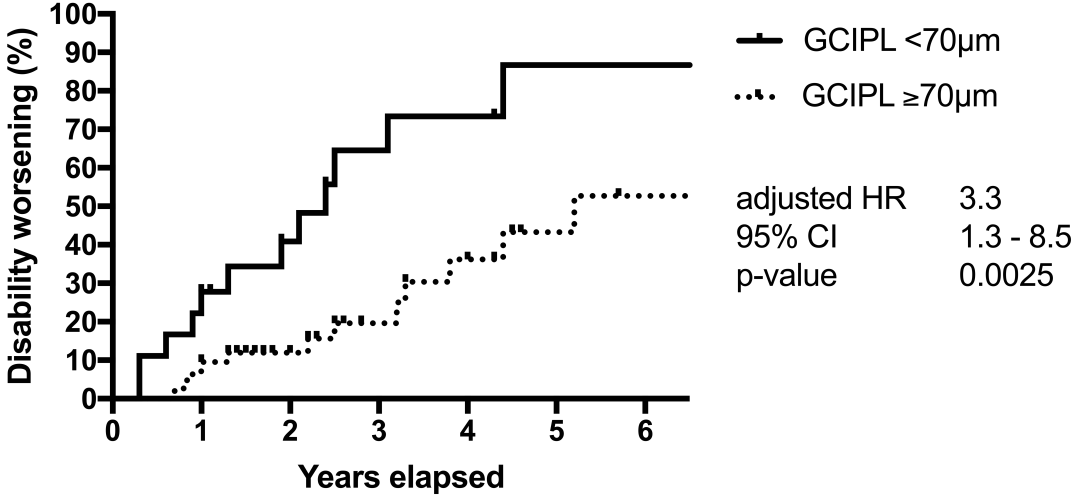

Supplement: Supplementary file 1 [file get_supplementary_file.php]
